# Supplementary material for: Alternative splicing of UCP1 by non-cell-autonomous action of PEMT
Source: PubMed Central journal article supplement — Mol Metab. 2019 Nov 8;31:55–66. doi: 10.1016/j.molmet.2019.10.007 (PMC6889607; doi:10.1016/j.molmet.2019.10.007), 2019-11-08
Supplement: mmc1.pdf [file mmc1.pdf]

## Supplementary Material for

### Alternative Splicing of UCP1 by Non-Cell-Autonomous Action of PEMT

Jordan M. Johnson, Anthony R.P. Verkerke, J. Alan Maschek, Patrick J. Ferrara, Chien-Te Lin, Kimberly A. Kew, P. Darrell Neufer, Irfan J. Lodhi, James E. Cox, Katsuhiko Funai\*

\*Corresponding author Email: [kfunai@health.utah.edu](mailto:kfunai@health.utah.edu)

#### **This file includes:**

Fig S1. Mitochondrial phenotyping of TAZKD and PEMTKO mice fed standard-chow  
Fig S2. Phenotyping of PEMT-BKO mice fed HFD  
Fig S3. Prolonged cold exposure does not rescue UCP1 protein levels in PEMTKO mice  
Table S1. Antibodies used in western blotting  
Table S2. Primers used in PCR reactions

**Figure S1**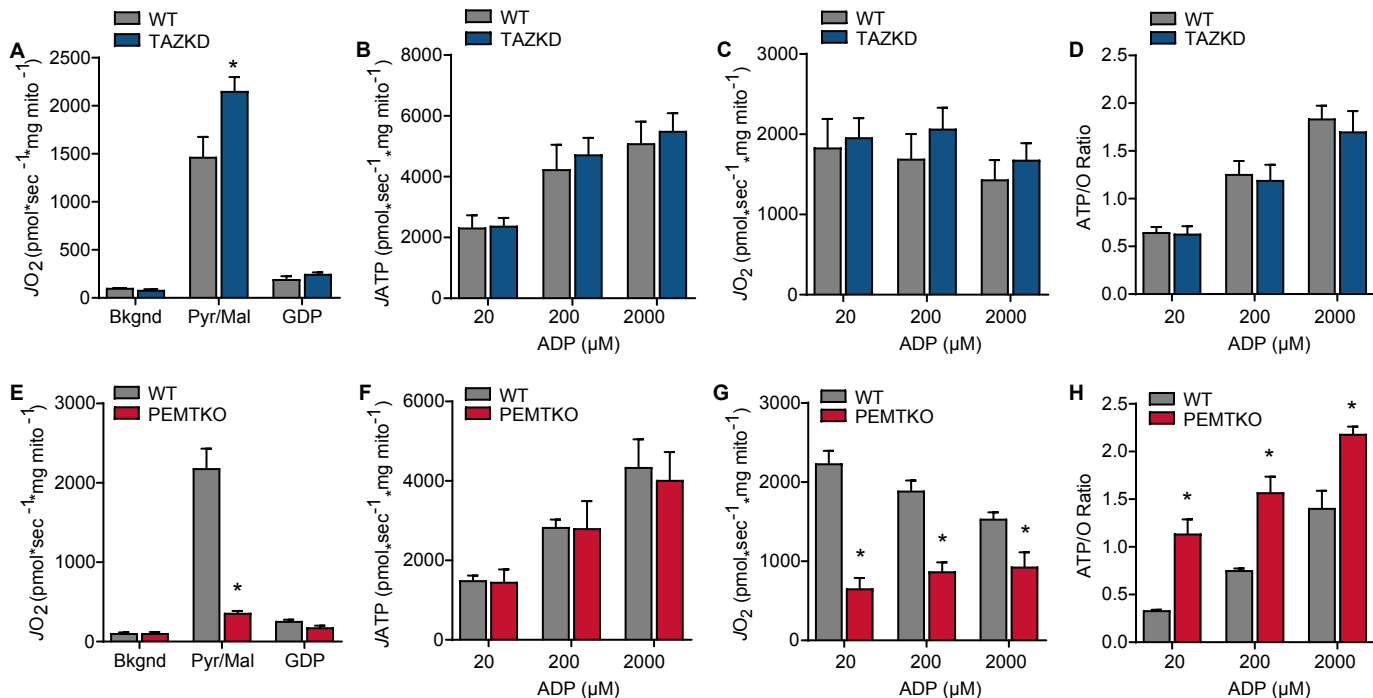

**Figure S1. Mitochondrial phenotyping of TAZKD and PEMTKO mice fed a standard-chow diet.** (A) UCP1-dependent respiration in BAT mitochondria from TAZKD mice, n=5-6. (B) ATP production in BAT mitochondria from TAZKD mice, n=5-6. (C)  $O_2$  utilization in BAT mitochondria from TAZKD mice, n=5-6. (D) ATP/O ratio in BAT mitochondria from TAZKD mice, n=5-6. (E) UCP1-dependent respiration in BAT mitochondria from PEMTKO mice, n=4-5. (F) ATP production in BAT mitochondria from PEMTKO mice, n=4-5. (G)  $O_2$  utilization in BAT mitochondria from PEMTKO mice, n=4-5. (H) ATP/O ratio in BAT mitochondria from PEMTKO mice, n=4-5. Data are expressed as mean  $\pm$  SEM, \*  $p < 0.05$ .

**Figure S2**

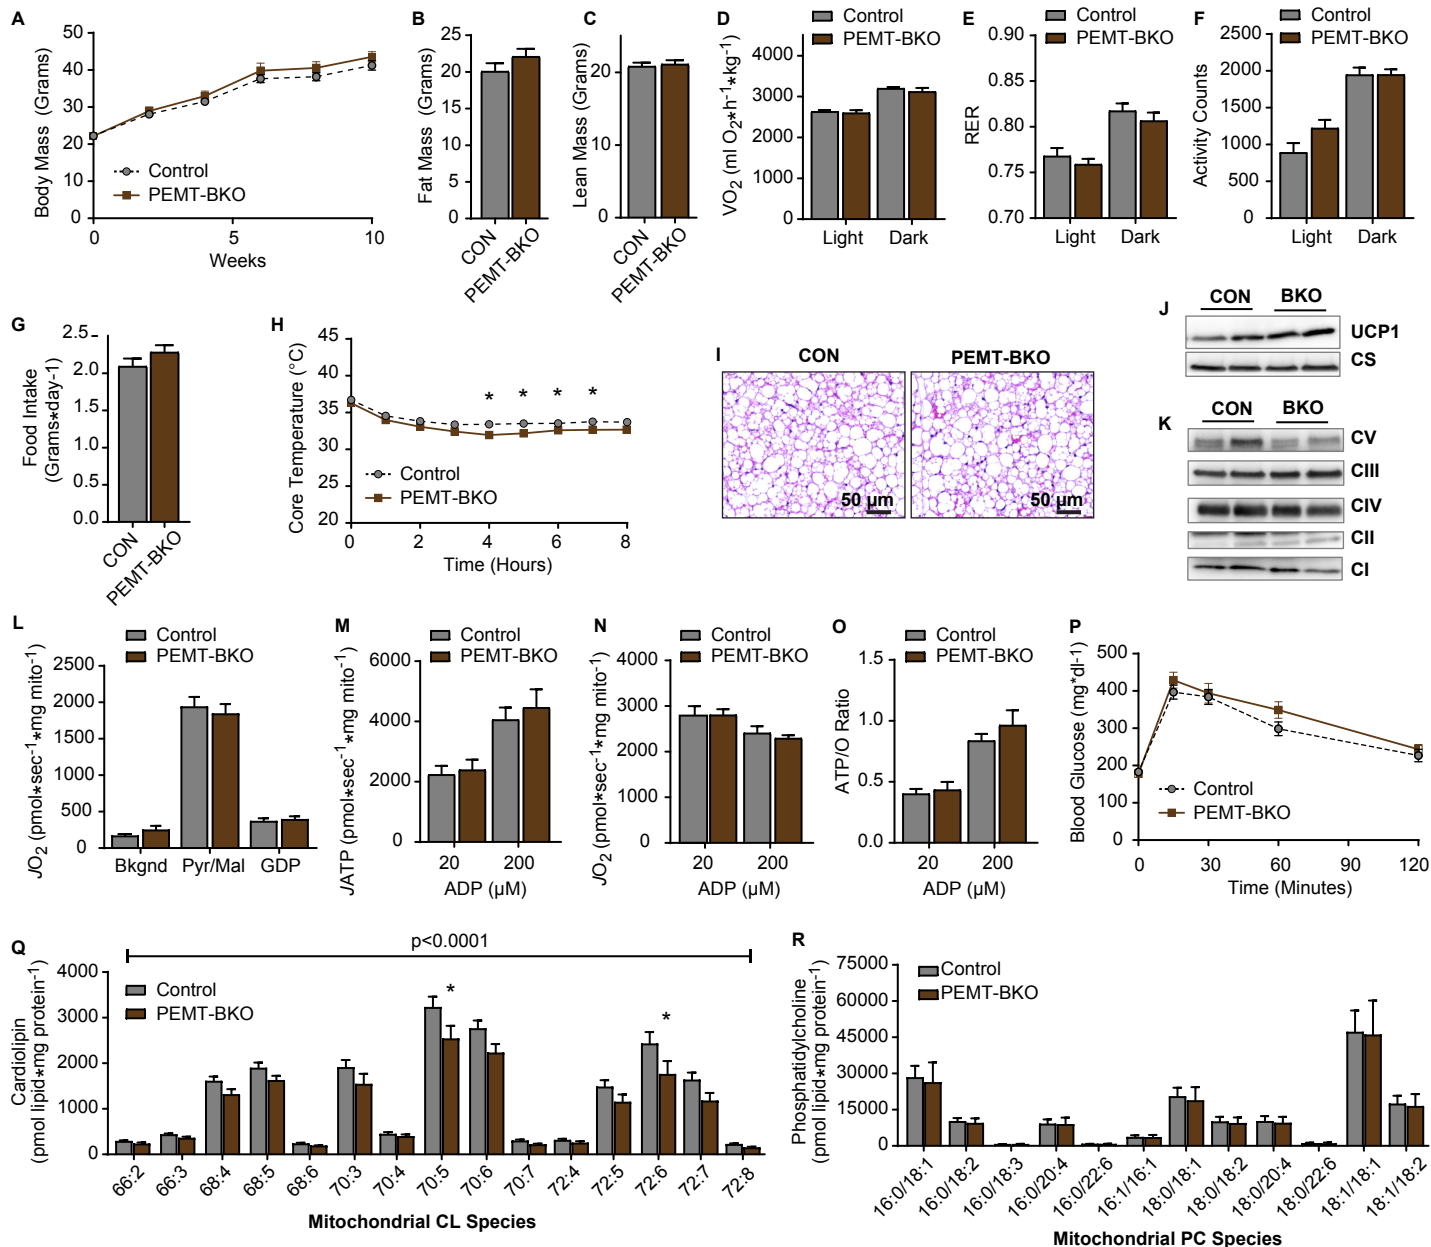

**Figure S2. Phenotyping of PEMT-BKO mice fed HFD.** (A) Body mass through 10 weeks of HFD in PEMT-BKO mice, n=11-14. (B-C) Fat mass and lean mass in PEMT-BKO mice following 10 weeks of HFD, n=11-13. (D) Whole-body  $VO_2$  measured by CLAMS, n=4. (E) RER, n=4. (F) Activity counts measured by beam breaks in the CLAMS system, n=4. (G) Food intake, n=4. (H) Cold tolerance test, n=8-11. (I) Histology images of BAT sections stained with hematoxylin and eosin. (J) Protein levels of UCP1 and CS. (K) Protein levels of ETS complexes. (L) UCP1-dependent respiration in BAT mitochondria from PEMT-BKO mice, n=7-11. (M) ATP production in BAT mitochondria from PEMT-BKO mice, n=7-11. (N)  $O_2$  consumption in BAT mitochondria from PEMT-BKO mice, n=7-11. (O) ATP/O ratio in BAT mitochondria from PEMT-BKO mice, n=7-11. (P) Glucose tolerance test in PEMT-BKO mice, n=11-14. (Q) Lipidomic analysis of CL, n=7-11. (R) Lipidomic analysis of mitochondrial PC, n=7-11. Data are expressed as mean  $\pm$  SEM, \* p<0.05.

Figure S3

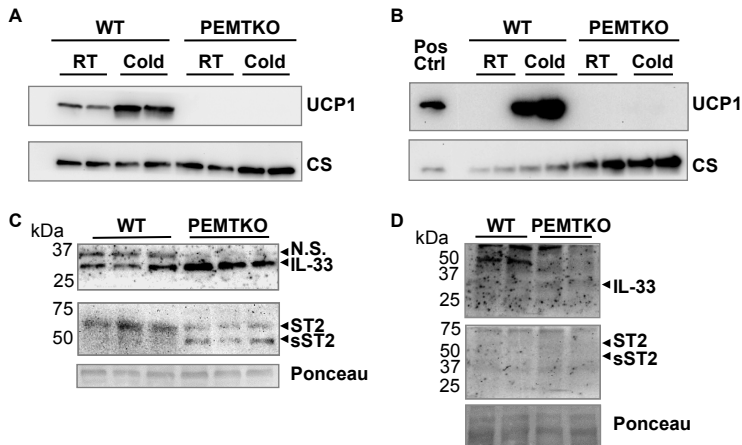

**Figure S3. Prolonged cold exposure does not rescue UCP1 protein levels in PEMTKO mice.** (A) UCP1 protein abundance in BAT from mice housed at 6.5° C for 7 days following cold acclimation. (B) UCP1 protein levels in iWAT following 7 days of cold exposure. 2 µg of BAT protein was used as a positive control for UCP1 expression. (C) Protein levels of membrane-bound ST2, soluble ST2 (sST2) and IL-33 in whole blood from WT and PEMTKO mice housed at room temperature. (D) IL-33 or ST2 was undetectable in BAT depots from both WT and PEMTKO mice, despite long exposure (25 mins) and concentrated protein load (60 µg).

**Table S1:** Antibodies used in western blotting.

| <b>Antibody</b>                             | <b>Source</b>    | <b>Catalogue Number</b> |
|---------------------------------------------|------------------|-------------------------|
| Rabbit Anti-Mouse UCP1                      | Alpha Diagnostic | Cat# UCP11-A            |
| Rabbit Anti-UCP1                            | ABCAM            | Cat# ab23841            |
| Rabbit Anti-UCP1                            | ABCAM            | Cat# ab10983            |
| Rabbit Anti-Mouse UCP1                      | Cell Signaling   | Cat# 14670S             |
| Total OXPHOS Rodent WB<br>Antibody Cocktail | ABCAM            | Cat# ab110413           |
| Anti-Citrate Synthetase                     | ABCAM            | Cat# ab96600            |
| Anti-Actin                                  | Sigma            | Cat# A2228              |
| Anti-PERK                                   | Cell Signaling   | Cat# 3192               |
| Anti-IRE $\alpha$                           | Cell Signaling   | Cat# 3294               |
| Anti-Chop                                   | Santa Cruz       | Cat# SC-793             |
| Anti-Tubulin                                | Santa Cruz       | Cat# SC-9104            |
| Anti-ST2                                    | R&D Systems      | Cat# AF1004             |
| Anti-IL-33                                  | R&D Systems      | Cat# AF3626             |

**Table S2:** Primers used in PCR reactions.

| <b>Primers</b>          |                             |                            |
|-------------------------|-----------------------------|----------------------------|
| <b>Gene</b>             | <b>Forward</b>              | <b>Reverse</b>             |
| UCP1                    | TCTCTGCCAGGACAGTACCC        | AGAAGCCACAAACCCTTTGA       |
| PEMT                    | GGTTACATGGACCCACAGA         | AGTTCTCTGCTCCCATCTCG       |
| TAZ                     | CCCTCCATGTGAAGTGGCCATTCC    | TGGTGGTTGGAGACGGTGATAAGG   |
| CRLS1                   | TGACCTATGCAGATCTTATTCCA     | TGGCAGAGTTCGGTATCTGA       |
| ALCAT1                  | TGGACCGCCTAAGAGAAGGGAA      | CGGTAACATGCAAGTTCAATGA     |
| PRDM16                  | ATGGGAGATGCTGACGGATA        | ACGCAGAACTTCTCGCTACC       |
| PGC1 $\alpha$           | TGTAGCGACCAATCGGAAAT        | TGAGGACCGCTAGCAAGTTT       |
| PGC1 $\beta$            | GCTCTCGTCCTTCTTCCTCA        | GAGGTCAAGCTCTGGCAAGT       |
| PPAR $\alpha$           | AGTTCGGGAACAAGACGTTG        | CAGTGGGGAGAGAGGACAGA       |
| PPAR $\delta$           | AGATGAAGACAAACCCACGG        | CTGTGGCTGTTCCATGACTG       |
| PPAR $\gamma$           | TGCACTGCCTATCAGCACTT        | GAATGCGAGTGGTCTTCCAT       |
| C/EBP $\alpha$          | CCAAGAAGTCGGTGGACAAG        | TTGTTTGGCTTTATCTCGGC       |
| C/EBP $\beta$           | GTTTCGGGACTTGATGCAAT        | GGCCCGGCTAGACAGTTAC        |
| UCP1 Splice Variant A   | TGTAAACAACAAAATACTGGCAGATG  | GACCCGAGTCGCAGAAAAG        |
| UCP1 Splice Variant B   | TGTAAACAACAAAATACTGGCAGCTC  | GACCCGAGTCGCAGAAAAG        |
| UCP1 Splice Variant C   | TGTAAACAACAAAATACTGGCAGGAC  | GACCCGAGTCGCAGAAAAG        |
| UCP1 Splice Variant D   | TGTAAACAACAAAATACTGGCAGGGT  | GACCCGAGTCGCAGAAAAG        |
| UCP1 Exon 5 genomic DNA | CGTCCCCTGCCATTTACTGT        | CTTTGAAAAAGGCCGTCGGT       |
| UCP1 Exon 5 cDNA        | TGTAAACAACAAAATACTGGCAG     | GACCCGAGTCGCAGAAAAG        |
| Cre                     | GCAAGAACCTGATGGACAGTTCAG    | GCAATCCCCAGAAATGCCAGATTAC  |
| FABP                    | TGGACAGGACTGGACCTCTCGCTTTCC | TAGAGCTTTGCCACATCACAGGTCAT |
| LoxP PEMT               | CTGGGAGTGAAAACACCATCC       | GAGGTGGAGACTGGGCTGATA      |
